# Supplementary material for: Teachers' Perspectives on the Challenges of Citizenship Education Curriculum Implementation in South Gondar Zone Secondary Schools, Northwestern Ethiopia
Source: Research Square preprint supplement (doi:10.21203/rs.3.rs-7534128/v1), 2025-12-08
Supplement: Supplementary file 1 [file 8e64fcdfa314a872882128de.docx]

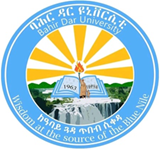


**APPENDICES**

***Appendix A*:** Questionnaire for Citizenship Teachers

**Title:** Teachers' Perspectives on the Challenges of Citizenship Education Curriculum Implementation in South Gondar Zone Secondary Schools, Northwestern Ethiopia

***Dear Respondents****, Selam!*

I ama doctor of education student in Citizenship education at Bahir Dar University, carrying out a research. The purpose of this study is to investigate challenges facing citizenship education practices in Ethiopia from teachers’ perspectives. The survey in this research has two data parts: a) Demographic and Socio- economic information b) Challenges facing to the implementation of Citizenship education. As it is critical to my academic endeavor to Citizenship education in Ethiopia, the quality of this study mainly depends on the information obtained from you. Therefore, kindly honesty in your responses will have great benefit to quality of this study. As required by the Bahir Dar University Ethical Review Board, all ethical standards, and particularly those related to your identity are confidentially kept. Thus, your cooperation in offering genuine responses is highly appreciated.

*Many thanks in advance for your genuine co-operation!*

*Gizachew Temesgen Mobil. Number +251 0910008549; E-Mail:* [*gizawab2019@gmail.com*](mailto:gizawab2019@gmail.com)

**General Direction:**

No need of writing your name.

**PART I. Demographic and socio- economic Information**

Direction: Below are a series of questions focusing on demographic characteristics and socio- economic status. Read each word or phrases carefully and put a tick (√) mark in alternatives that properly describe you.

| 1. | Name of the School | (*optional*) |
| --- | --- | --- |
| 2 | Sex | 1. Male 🞎 2. Female 🞎 |
| 3. | Age | 1. ≤ 24 🞎 2. 25 – 34 🞎 3. 35 – 44 🞎 4. 45 – 54 🞎 5. ≥ 55 🞎 |
| 4. | Marital status | 1. Single 🞎 2. Married 🞎 3. Divorced 🞎 |
| 5 | Educational Qualification | 1. B.ED 🞎 2. BA/BSC 🞎 3. M.Ed. 🞎 4. MA/MSC 🞎 |
| 6 | If you are BED/BA graduate, your field of specialization | 1. Civics and ethical education 🞎 2. History 🞎 3. Geography 🞎 4. PSIR 🞎  5. Amharic🞎 6. English 🞎 7. Natural sciences 🞎 8. Others, if any 🞎 |
| 7 | Program of your BED/BA or BSC | Regular 🞎 2. Summer 🞎 3. Distance 🞎 4. Extension 🞎 |
| 8 | If you are MED/MA graduate, your field of specialization is | 1. Civic and ethical education 🞎 2. Peace and conflict studies 🞎 3. PSIR 🞎  4. Federal studies 🞎 5. History 🞎 6. Geography and environmental studies 🞎  7. Others, if any 🞎 |
| 9 | The program of your MED/MA | Regular 🞎 2. Summer 🞎 3. Distance 🞎 4. Extension 🞎 |
| 10 | How long have you been working as a teacher? | 1. This is my first year 🞎 2. 1-2 years 🞎 3. 3-5 years 🞎 4. 6-10 years 🞎  5. 11-15 years 🞎 6. 16-20 years 🞎 7. more than 20 years 🞎 |

**PART II:** Challenges facing to Citizenship Education Curriculum Implementation

**Direction:** Below are series of statements which may represent challenges facing to the implementation of Citizenship Education. Circle the most appropriate level of your agreement or disagreement from the alternatives where: **1**=Strongly Disagree;  **2**=Disagree;  **3**=Neutral; **4**=Agree; **5**=Strongly Agree.

| S.N | Questionnaire Items | *Responses* | | | | |
| --- | --- | --- | --- | --- | --- | --- |
| 1 | Citizenship teachers (CTs ) perceiving CE as the tool for ruling party ideology indoctrination | 1 | *2* | *3* | *4* | *5* |
| 2 | CTs are viewing citizenship education negatively | 1 | *2* | *3* | *4* | *5* |
| 3 | CTs lack of trust on CE in developing civic competence | 1 | *2* | *3* | *4* | *5* |
| 4 | The community disrespect of CE teachers | 1 | *2* | *3* | *4* | *5* |
| 5 | The school community views citizenship teachers as the agents of ruling party in the school | 1 | *2* | *3* | *4* | *5* |
| 6 | The school community views CE as a ruling party ideology indoctrination tools | 1 | *2* | *3* | *4* | *5* |
| 7 | The school community are believing that CE could not able to develop students’ morality | 1 | *2* | *3* | *4* | *5* |
| 8 | CTs have encountered societal undervaluation of the profession | 1 | *2* | *3* | *4* | *5* |
| 9 | CTs have substandard living conditions | 1 | *2* | *3* | *4* | *5* |
| 10 | CTs have low interest in teaching profession | 1 | *2* | *3* | *4* | *5* |
| 11 | CTs have professional misconduct | 1 | *2* | *3* | *4* | *5* |
| 12 | CE curriculum less emphasis given to Ethiopian moral values | 1 | *2* | *3* | *4* | *5* |
| 13 | CE content gave more focus on theoretical issues | 1 | *2* | *3* | *4* | *5* |
| 14 | CE content have less emphasis given to the socioeconomic and political practices | 1 | *2* | *3* | *4* | *5* |
| 15 | The implemented CE content lack vertical integration between grade levels (grades 9 &10) | 1 | *2* | *3* | *4* | *5* |
| 16 | The implemented CE content lack horizontal integration between grade levels (grades 9 &10) | 1 | *2* | *3* | *4* | *5* |
| 17 | CE contents focus more on the political issues than moral or ethical values | 1 | *2* | *3* | *4* | *5* |
| 18 | There is inadequate time allotted to CE learning-teaching per week | 1 | *2* | *3* | *4* | *5* |
| 19 | In our school, there is inadequate citizenship education text book | 1 | *2* | *3* | *4* | *5* |
| 20 | lack of teaching equipment and materials for the teaching and learning of CE | 1 | *2* | *3* | *4* | *5* |
| 21 | In our school, there is lack of supplementary CE books | 1 | *2* | *3* | *4* | *5* |
| 22 | In our school, there is lack of teaching aids for CE instructions | 1 | *2* | *3* | *4* | *5* |
| 23 | In our school, there is inadequate supply of school furniture | 1 | *2* | *3* | *4* | *5* |
| 24 | In our school, there is absence of information communication technology | 1 | *2* | *3* | *4* | *5* |
| 25 | CTs have lack of a culture of holding workshops, conferences, and panel discussions | 1 | *2* | *3* | *4* | *5* |
| 26 | There is low interest of students to learn through active learning methods | 1 | *2* | *3* | *4* | *5* |
| 27 | CTs have difficulties to practices dialogues or debates to teach due to low students’ capacity | 1 | *2* | *3* | *4* | *5* |
| 28 | CTs have perceiving teacher-center method as the principal CE teaching method | 1 | *2* | *3* | *4* | *5* |
| 29 | CTs have not recognizing the contribution of clubs to citizenship education | 1 | *2* | *3* | *4* | *5* |
| 30 | CTs have less attention to the students’ engagement in community service | 1 | *2* | *3* | *4* | *5* |
| 31 | CTs lack of commitment to practice participatory teaching methods | 1 | *2* | *3* | *4* | *5* |
| 32 | CTs lack of exemplary or role model personality in the community | 1 | *2* | *3* | *4* | *5* |

- *Citizenship Teachers’ attitude related challenges (1-3)*
- *School community‘s related challenges ……….... (4-7)*
- *Teaching profession attitudinal challenges ……. (8-11)*
- *Citizenship education content related challenges (12-17)*
- *Educational inputs related challenges ………….. (18-23)*
- *Teaching methods related challenges ……………(24-32)*

**Appendix B: Interview Guideline to Key Informants**

**Part I:**  **Interview guide for *Citizenship Teachers***

1. Name of the School_________________________
2. Teacher’s Code: ________________
3. Gender: 1.Female 2. Male
4. Age:___________
5. Educational Qualification ___________________
6. Teaching experience:_______________________
7. Grade level (he/she teaches):___________________
8. Date of interview:______________Starting time:___________Ending time:___________

**Interview guide line:**

1. Are your activities being effective in improving the objectives of citizenship education in secondary schools?
2. What are the main challenges facing the implementation of citizenship education in your school? How could be resolved? Regarding
   1. your attitude towards the implementation of Citizenship education
   2. The provision of educational resources for Citizenship education
   3. The education management of Citizenship education
   4. The attitude of local community towards Citizenship education
   5. CE Teachers' attitude towards the profession
   6. Teaching and learning processes of Citizenship education

**Part II: Interview guideline for School Principals*:***

Name of the School______________________

Principal’s Code: ______________

Gender: 1. Female 2. Male Age:________

Educational Qualification _______________

Work experiences: _____________________

Field of study:_________________________

Date of Interview_____________ Starting time___________ ending time__________

***Interview guide line:***

1. What are the main challenges facing the implementing citizenship education curriculum in secondary schools? How could be resolved?

**Part III: Interview guide line to Educational Experts (Supervisors):**

Name of the woreda educational office_________________________

Expert’s Code: _____________ Gender: 1. Female 2. Male, Age: __________

Educational Qualification ________________

Work experiences: ______________________

Field of study: _________________________

Date of Interview: ________________Starting time__________Ending time__________

**Interview guide line:**

1. Do you provide sufficient resource for the implementation of the CE curriculum?
2. Do you think you have got up-to-date training which enables you to effectively implement a CE curriculum in your school?
3. In your opinion, what are the major challenges you encountered in the process of implementing a citizenship education program in secondary schools?

**Part IV: Interview guides for Students’ parents**

1. Name of the School_________________________
2. Parent’s Code: ______________
3. Gender: 1. Female 2. Male
4. Age:________
5. Educational status_______________
6. Parents’ job____________________
7. Date of Interview________________ Starting time_____________ ending time___________

**Interview guide line:**

1. How do you perceive the practices of citizenship education in developing the student’s behavior?
2. What are the problems of schools facing in implementing citizenship education?

**Appendix C: Focus group discussion (For students and Citizenship Teachers)**

This survey is conducted in selected secondary schools of South Gondar administration Zone. The study intends to examine “Teachers' Perspectives on the Challenges of Citizenship Education Curriculum Implementation in South Gondar Zone Secondary Schools, Northwestern Ethiopia”. The information you provide will help us understand how the key stakeholders’ perceive the challenges faced to improve the learning objectives from the teachers perspectives. Your participation on this discussion is entirely based on your consent and the information obtained will be kept strictly confidential and used only for the purpose of this research.

**I. Background Information**

1. School name: …………………………………
2. Zone: …………………………………………
3. Woreda………………………………………
4. Location of the school: Urban…… Rural……..
5. Schooling arrangement: Full time…… Shift system…….
6. Number of Citizenship education teachers…………
7. Number of Citizenship education teachers by sex: M………F……..

**Focus Group Dissections (FGD) guideline:**

1. How do you perceive and evaluate the role of citizenship education in preparing good citizens?
2. How do you evaluate your teachers’ professional practice in improving CE learning objectives?
3. What are the main challenges that impede students’ learning of citizenship education curriculum in your school? How could be resolved?
4. How do you evaluate your directors’, parents’, and educational experts’ roles in shaping students’ behavior to prepare good citizens

**Appendix-D: Classroom observation checklist on Citizenship teachers**

**Part I. Participant demographic Information**

The main purpose of this observation checklist is to assess the activities practiced in the classroom in relation to the instructional practices of Citizenship Education. The activities will be marked in the category of Yes/No on the basis of whether the following practices happen or not in the classroom.

Woreda administration: Grade and section: ____________ Observer’s name: __________

School: ________________ Unit/ Sub-unit: ________________

Date and signature _________________ Teacher’s Code ____________Topic of the session: ____________

**PART II. Observation checklist for teachers on Citizenship education classroom instructional practices**

| N | Indicators | Remarks | | Comment |
| --- | --- | --- | --- | --- |
| **I** | **Classroom instructional practices (**Teaching methods, Classroom management & assessment) | YES | NO |  |
| 1 | Does the teacher use appropriate (interactive) methods to the contents? |  |  |
| 2 | Do the patterns of interaction (class work, group work, pair work, and individual work) used in the activities contribute to the attainment of the objectives? |  |  |
| 3 | Are the learning activities facilitated effectively? |  |  |
| 4 | Does the teacher provide clear and constructive feedback on student’s responses/performance in each learning activity? |  |  |
| 5 | Does the learning activities contribute to promote critical thinking / to develop inquiry skills (observing, classifying, comparing and contrasting, asking questions, reasoning skills, logical thinking)? |  |  |
| 6 | Does the teacher check students’ understanding throughout the lesson using different and adequate assessment techniques that provoke citizenship skills and values? |  |  |
| 7 | Are students actively engaged in the given activities both physically and mentally? |  |  |
| 8 | Do students respond to posed questions with their own words? |  |  |
| 9 | Do students ask questions or clarifications for any ambiguities? |  |  |
| 10 | Do students connect prior knowledge and experience? |  |  |
| 11 | Are certain passive learners (students) encouraged to take part in the activities? |  |  |
| **II** | **Mastery of subject matter** |  |  |  |
| 1 | Does the teacher provide adequate support for students learning? (e.g. explanations, guidance) |  |  |
| 2 | Does the teacher identify learners’ errors and help them make corrections |  |  |
| 3 | Does the teacher explain concepts and ideas using simple expression and other methods (e.g. analogies, examples, contextualization, etc.)? |  |  |
| 4 | Does the teacher use praise and encouragement to student’s efforts? |  |  |
| **III** | **Teaching and learning aids** |  |  |  |
| 1 | Does the teacher use any kind of teaching and learning materials apart from text books, blackboard and chalk? |  |  |
| 2 | Are the materials prepared properly and made ready before the lesson? |  |  |
| 3 | Does the material fit with the learning contents of lesson? |  |  |
| 4 | Are the materials used in the lesson useful for enhancing student’s understandings? |  |  |
| 5 | Are the introductory part / starter activities of the lesson students so well motivating for students? |  |  |
| 6 | Does teacher allocate sufficient time to each learning activity? |  |  |
| 7 | Does teacher make appropriate pacing of lessons for student learning |  |  |
| **IV** | **Lesson planning** |  |  |  |
| 1 | Does the teacher make clear the lesson objectives? |  |  |
| 2 | Are the objectives + materials+ activities+ assessment consistent? |  |  |
| 3 | Does the lesson plan include a sequence of activities, materials and assessment for student’s learning? |  |  |
| 4 | Are the lesson objectives achieved? |  |  |

**Appendix E: Documents Review:**

- Policy documents

- Rules and regulations of the school

- Anecdotal records (if any)

- Minutes related to the issue under study

**Reviewing of Documents and Citizenship Teachers’ Instructional Plans**

1. Do you think the instructional plans of CE include the necessary components?
2. What the records of Minutes related to the practices to improve the Citizenship education learning objectives and the perception towards the implementation of CE looks like
3. Which immoral practices of students and teachers are dominantly registered within the schools?
4. How the rules and regulations of the schools and curriculum framework of general education state the way of practicing citizenship education in secondary schools?
